# Supplementary material for: Identification of Potential Glycoprotein Biomarkers in Estrogen Receptor Positive (ER+) and Negative (ER-) Human Breast Cancer Tissues by LC-LTQ/FT-ICR Mass Spectrometry
Source: PubMed Central journal article supplement — J Cancer. 2012 Jun 21;3:269–84. doi: 10.7150/jca.4592 (PMC3390597; doi:10.7150/jca.4592), 2012-06-21

Supplementary Table 1

| Samples           | Trial 1 | Trial 2 | Trial 3 | Trial 4 | Trial 5 | Trial 6 | Trial 7 | Trial 8 | Trial 9 | Trial 10 | Trial 11 | Trial 12 | Avg.   | Mean   | Variance | Standard Deviation | 95% Confidence Interval |
|-------------------|---------|---------|---------|---------|---------|---------|---------|---------|---------|----------|----------|----------|--------|--------|----------|--------------------|-------------------------|
| ER+ Total Protein | 355     | 391     | 331     | 403     | 311     | 139     | 425     | 465     | 422     | 396      | 413      | 579      | 385.83 | 399.50 | 10733.61 | 103.603            | 58.618                  |
| ER- Total Protein | 234     | 316     | 293     | 329     | 310     | 142     | 493     | 469     | 410     | 552      | 553      | 525      | 385.50 | 369.50 | 18081.00 | 134.466            | 76.080                  |
| ER+ Glycoprotein  | 126     | 101     | 233     | 135     | 116     | 16      |         |         |         |          |          |          | 121.17 | 121.00 | 4842.97  | 69.591             | 55.684                  |
| ER- Glycoprotein  | 79      | 78      | 269     | 175     | 139     | 14      |         |         |         |          |          |          | 125.67 | 109.00 | 8015.07  | 89.527             | 71.635                  |

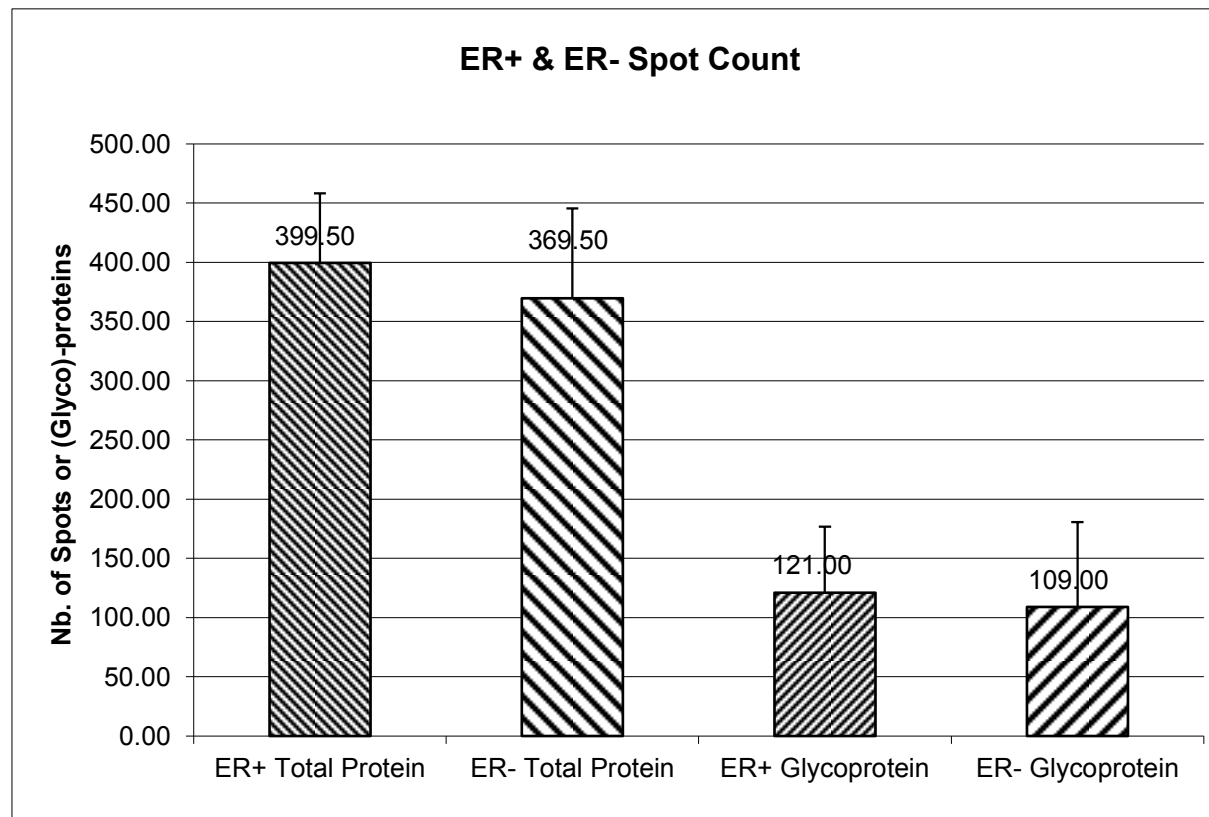

Supplement: jcav03p0269s1.pdf [file jcav03p0269s1.pdf]
